# Supplementary material for: Novel homozygous nonsense mutation of MLIP and compensatory alternative splicing
Source: PubMed Central journal article supplement (PMC9174206; doi:10.1038/s41525-022-00307-y), 2022-06-07
Supplement: 41525_2022_307_MOESM1_ESM.pdf [file 41525_2022_307_MOESM1_ESM.pdf]

Supplementary materials for

**Novel homozygous nonsense mutation of MLIP and compensatory alternative splicing**

Jean Mezreani,<sup>1,2†</sup> Sébastien Audet,<sup>1,2†</sup> Florence Martin,<sup>1,2</sup> Jade Charbonneau,<sup>1</sup> Valérie Triassi,<sup>1,3</sup>  
Eric Bareke,<sup>1</sup> Annie Laplante,<sup>1</sup> Jason Karamchandani,<sup>4,5</sup> Rami Massie,<sup>4,5</sup> Colin H Chalk,<sup>4,5</sup> Erin  
O’Ferrall,<sup>4,5</sup> and Martine Tétreault <sup>1,2,3</sup>

† These authors contributed equally

1 CHUM Research Center, Montreal, Quebec, Canada

2 Department of Neurosciences, University of Montreal, Montreal, Quebec, Canada

3 Department of Bioinformatics, University of Montreal, Montreal, Quebec, Canada

4 Department of Neurology and Neurosurgery, Montreal Neurological Institute, Montreal,  
Quebec, Canada

5 Department of Pathology, Montreal Neurological Institute, Montreal, Quebec, Canada

Correspondence to: Martine Tétreault

Healthcare Center of the University of Montreal, Research Center Building

CRCHUM, 900 Saint-Denis

Montréal H2X 0A9, Quebec, Canada

E-mail: [martine.tetreault@umontreal.ca](mailto:martine.tetreault@umontreal.ca)

**Supplementary Table 1. Genetic analysis performed for patient Z46.**

| <b>Table 1. Clinical Genetic Testing</b>                                                                                                                                                                                                                                                                                                                                                                                                                                                                                                                                                                                                                                                                                                                                                                                                                                                                                                                                                                                                                                                                                                                                                                                                                                                                                                                                                                                                                                                                                                                                                                                                                                                                                                                                                                                                                                                                                                                                                                                                                                                                                                                                                                                                                                                                                                                                                                                                                                                                                                                                                                                                                                                                                                                                                                                                                                                                                                                                                                                                                                                                                                                                                                                                                                                                                                                                                                                                                                                                                                                                                                                                                                                                                                                                                                                                                                                                                                                                                                                                                                                                                                                                                                                                                                                                                                                                                                                                                                                                                                                                                                                                                                                                                                                                                                                                                                                                                                                                                                                                                                                                                                                                                                                                                                                                                                                                                                                                                                                                                                                                                                                                                                                                                                                                                                                                                                                                                                                                                                                                                                                                                                                                                                                                                                                                                                                                                                                                                                                                                                                                                                                                                                                                                                           |               |              |                                |                                                                          |                                           |                    |                                   |
|----------------------------------------------------------------------------------------------------------------------------------------------------------------------------------------------------------------------------------------------------------------------------------------------------------------------------------------------------------------------------------------------------------------------------------------------------------------------------------------------------------------------------------------------------------------------------------------------------------------------------------------------------------------------------------------------------------------------------------------------------------------------------------------------------------------------------------------------------------------------------------------------------------------------------------------------------------------------------------------------------------------------------------------------------------------------------------------------------------------------------------------------------------------------------------------------------------------------------------------------------------------------------------------------------------------------------------------------------------------------------------------------------------------------------------------------------------------------------------------------------------------------------------------------------------------------------------------------------------------------------------------------------------------------------------------------------------------------------------------------------------------------------------------------------------------------------------------------------------------------------------------------------------------------------------------------------------------------------------------------------------------------------------------------------------------------------------------------------------------------------------------------------------------------------------------------------------------------------------------------------------------------------------------------------------------------------------------------------------------------------------------------------------------------------------------------------------------------------------------------------------------------------------------------------------------------------------------------------------------------------------------------------------------------------------------------------------------------------------------------------------------------------------------------------------------------------------------------------------------------------------------------------------------------------------------------------------------------------------------------------------------------------------------------------------------------------------------------------------------------------------------------------------------------------------------------------------------------------------------------------------------------------------------------------------------------------------------------------------------------------------------------------------------------------------------------------------------------------------------------------------------------------------------------------------------------------------------------------------------------------------------------------------------------------------------------------------------------------------------------------------------------------------------------------------------------------------------------------------------------------------------------------------------------------------------------------------------------------------------------------------------------------------------------------------------------------------------------------------------------------------------------------------------------------------------------------------------------------------------------------------------------------------------------------------------------------------------------------------------------------------------------------------------------------------------------------------------------------------------------------------------------------------------------------------------------------------------------------------------------------------------------------------------------------------------------------------------------------------------------------------------------------------------------------------------------------------------------------------------------------------------------------------------------------------------------------------------------------------------------------------------------------------------------------------------------------------------------------------------------------------------------------------------------------------------------------------------------------------------------------------------------------------------------------------------------------------------------------------------------------------------------------------------------------------------------------------------------------------------------------------------------------------------------------------------------------------------------------------------------------------------------------------------------------------------------------------------------------------------------------------------------------------------------------------------------------------------------------------------------------------------------------------------------------------------------------------------------------------------------------------------------------------------------------------------------------------------------------------------------------------------------------------------------------------------------------------------------------------------------------------------------------------------------------------------------------------------------------------------------------------------------------------------------------------------------------------------------------------------------------------------------------------------------------------------------------------------------------------------------------------------------------------------------------------------------------------------------------------------------------|---------------|--------------|--------------------------------|--------------------------------------------------------------------------|-------------------------------------------|--------------------|-----------------------------------|
| Gene                                                                                                                                                                                                                                                                                                                                                                                                                                                                                                                                                                                                                                                                                                                                                                                                                                                                                                                                                                                                                                                                                                                                                                                                                                                                                                                                                                                                                                                                                                                                                                                                                                                                                                                                                                                                                                                                                                                                                                                                                                                                                                                                                                                                                                                                                                                                                                                                                                                                                                                                                                                                                                                                                                                                                                                                                                                                                                                                                                                                                                                                                                                                                                                                                                                                                                                                                                                                                                                                                                                                                                                                                                                                                                                                                                                                                                                                                                                                                                                                                                                                                                                                                                                                                                                                                                                                                                                                                                                                                                                                                                                                                                                                                                                                                                                                                                                                                                                                                                                                                                                                                                                                                                                                                                                                                                                                                                                                                                                                                                                                                                                                                                                                                                                                                                                                                                                                                                                                                                                                                                                                                                                                                                                                                                                                                                                                                                                                                                                                                                                                                                                                                                                                                                                                               | Mutation      | Zygoty       | Status                         | Associated Disease(s)                                                    | Inheritance(s)                            | Matching Phenotype | Source                            |
| RAPSN                                                                                                                                                                                                                                                                                                                                                                                                                                                                                                                                                                                                                                                                                                                                                                                                                                                                                                                                                                                                                                                                                                                                                                                                                                                                                                                                                                                                                                                                                                                                                                                                                                                                                                                                                                                                                                                                                                                                                                                                                                                                                                                                                                                                                                                                                                                                                                                                                                                                                                                                                                                                                                                                                                                                                                                                                                                                                                                                                                                                                                                                                                                                                                                                                                                                                                                                                                                                                                                                                                                                                                                                                                                                                                                                                                                                                                                                                                                                                                                                                                                                                                                                                                                                                                                                                                                                                                                                                                                                                                                                                                                                                                                                                                                                                                                                                                                                                                                                                                                                                                                                                                                                                                                                                                                                                                                                                                                                                                                                                                                                                                                                                                                                                                                                                                                                                                                                                                                                                                                                                                                                                                                                                                                                                                                                                                                                                                                                                                                                                                                                                                                                                                                                                                                                              | c.264C > A    | Heterozygous | Pathogenic / Likely Pathogenic | Congenital Myasthenic Syndrome 11 (CMS11)                                | Autosomal Recessive                       | No                 | Gene Panel <sup>1</sup> & RNA-seq |
| SCN4A                                                                                                                                                                                                                                                                                                                                                                                                                                                                                                                                                                                                                                                                                                                                                                                                                                                                                                                                                                                                                                                                                                                                                                                                                                                                                                                                                                                                                                                                                                                                                                                                                                                                                                                                                                                                                                                                                                                                                                                                                                                                                                                                                                                                                                                                                                                                                                                                                                                                                                                                                                                                                                                                                                                                                                                                                                                                                                                                                                                                                                                                                                                                                                                                                                                                                                                                                                                                                                                                                                                                                                                                                                                                                                                                                                                                                                                                                                                                                                                                                                                                                                                                                                                                                                                                                                                                                                                                                                                                                                                                                                                                                                                                                                                                                                                                                                                                                                                                                                                                                                                                                                                                                                                                                                                                                                                                                                                                                                                                                                                                                                                                                                                                                                                                                                                                                                                                                                                                                                                                                                                                                                                                                                                                                                                                                                                                                                                                                                                                                                                                                                                                                                                                                                                                              | c.4270 G > A  | Heterozygous | Pathogenic / Likely Pathogenic | Hyperkalemic Periodic Paralysis (HYPP) - Paramyotonia Congenita (PMC)    | Autosomal Dominant - Autosomal Dominant   | No                 | Gene Panel <sup>1</sup> & RNA-seq |
| MLIP                                                                                                                                                                                                                                                                                                                                                                                                                                                                                                                                                                                                                                                                                                                                                                                                                                                                                                                                                                                                                                                                                                                                                                                                                                                                                                                                                                                                                                                                                                                                                                                                                                                                                                                                                                                                                                                                                                                                                                                                                                                                                                                                                                                                                                                                                                                                                                                                                                                                                                                                                                                                                                                                                                                                                                                                                                                                                                                                                                                                                                                                                                                                                                                                                                                                                                                                                                                                                                                                                                                                                                                                                                                                                                                                                                                                                                                                                                                                                                                                                                                                                                                                                                                                                                                                                                                                                                                                                                                                                                                                                                                                                                                                                                                                                                                                                                                                                                                                                                                                                                                                                                                                                                                                                                                                                                                                                                                                                                                                                                                                                                                                                                                                                                                                                                                                                                                                                                                                                                                                                                                                                                                                                                                                                                                                                                                                                                                                                                                                                                                                                                                                                                                                                                                                               | c.2284 C > T  | Homozygous   | VUS                            | –                                                                        | –                                         | –                  | RNA-seq                           |
| TTN                                                                                                                                                                                                                                                                                                                                                                                                                                                                                                                                                                                                                                                                                                                                                                                                                                                                                                                                                                                                                                                                                                                                                                                                                                                                                                                                                                                                                                                                                                                                                                                                                                                                                                                                                                                                                                                                                                                                                                                                                                                                                                                                                                                                                                                                                                                                                                                                                                                                                                                                                                                                                                                                                                                                                                                                                                                                                                                                                                                                                                                                                                                                                                                                                                                                                                                                                                                                                                                                                                                                                                                                                                                                                                                                                                                                                                                                                                                                                                                                                                                                                                                                                                                                                                                                                                                                                                                                                                                                                                                                                                                                                                                                                                                                                                                                                                                                                                                                                                                                                                                                                                                                                                                                                                                                                                                                                                                                                                                                                                                                                                                                                                                                                                                                                                                                                                                                                                                                                                                                                                                                                                                                                                                                                                                                                                                                                                                                                                                                                                                                                                                                                                                                                                                                                | c.38002 A > G | Heterozygous | VUS                            | Dilated Cardiomyopathy 1G (CMD1G) - Limb-Girdle, type 2J (LGMD2J)        | Autosomal Dominant - Autosomal Recessive  | No                 | RNA-seq                           |
| GMPPB                                                                                                                                                                                                                                                                                                                                                                                                                                                                                                                                                                                                                                                                                                                                                                                                                                                                                                                                                                                                                                                                                                                                                                                                                                                                                                                                                                                                                                                                                                                                                                                                                                                                                                                                                                                                                                                                                                                                                                                                                                                                                                                                                                                                                                                                                                                                                                                                                                                                                                                                                                                                                                                                                                                                                                                                                                                                                                                                                                                                                                                                                                                                                                                                                                                                                                                                                                                                                                                                                                                                                                                                                                                                                                                                                                                                                                                                                                                                                                                                                                                                                                                                                                                                                                                                                                                                                                                                                                                                                                                                                                                                                                                                                                                                                                                                                                                                                                                                                                                                                                                                                                                                                                                                                                                                                                                                                                                                                                                                                                                                                                                                                                                                                                                                                                                                                                                                                                                                                                                                                                                                                                                                                                                                                                                                                                                                                                                                                                                                                                                                                                                                                                                                                                                                              | c.893 G > A   | Heterozygous | Likely Pathogenic              | Muscular Dystrophy-Dystroglycanopathy Type A14 - C14 (MDDGA14 - MDDGC14) | Autosomal Recessive - Autosomal Recessive | No                 | RNA-seq                           |
| LMOD3                                                                                                                                                                                                                                                                                                                                                                                                                                                                                                                                                                                                                                                                                                                                                                                                                                                                                                                                                                                                                                                                                                                                                                                                                                                                                                                                                                                                                                                                                                                                                                                                                                                                                                                                                                                                                                                                                                                                                                                                                                                                                                                                                                                                                                                                                                                                                                                                                                                                                                                                                                                                                                                                                                                                                                                                                                                                                                                                                                                                                                                                                                                                                                                                                                                                                                                                                                                                                                                                                                                                                                                                                                                                                                                                                                                                                                                                                                                                                                                                                                                                                                                                                                                                                                                                                                                                                                                                                                                                                                                                                                                                                                                                                                                                                                                                                                                                                                                                                                                                                                                                                                                                                                                                                                                                                                                                                                                                                                                                                                                                                                                                                                                                                                                                                                                                                                                                                                                                                                                                                                                                                                                                                                                                                                                                                                                                                                                                                                                                                                                                                                                                                                                                                                                                              | c.39_41Del    | Heterozygous | Benign                         | Nemaline Myopathy 10 (NEM10)                                             | Autosomal Recessive                       | No                 | RNA-seq                           |
| AMPD1                                                                                                                                                                                                                                                                                                                                                                                                                                                                                                                                                                                                                                                                                                                                                                                                                                                                                                                                                                                                                                                                                                                                                                                                                                                                                                                                                                                                                                                                                                                                                                                                                                                                                                                                                                                                                                                                                                                                                                                                                                                                                                                                                                                                                                                                                                                                                                                                                                                                                                                                                                                                                                                                                                                                                                                                                                                                                                                                                                                                                                                                                                                                                                                                                                                                                                                                                                                                                                                                                                                                                                                                                                                                                                                                                                                                                                                                                                                                                                                                                                                                                                                                                                                                                                                                                                                                                                                                                                                                                                                                                                                                                                                                                                                                                                                                                                                                                                                                                                                                                                                                                                                                                                                                                                                                                                                                                                                                                                                                                                                                                                                                                                                                                                                                                                                                                                                                                                                                                                                                                                                                                                                                                                                                                                                                                                                                                                                                                                                                                                                                                                                                                                                                                                                                              | c.303-1 G > A | Heterozygous | VUS                            | Myopathy Due to Myoadenylate Deaminase Deficiency (MMDD)                 | Autosomal Recessive                       | Moderate           | RNA-seq                           |
| KIF21A                                                                                                                                                                                                                                                                                                                                                                                                                                                                                                                                                                                                                                                                                                                                                                                                                                                                                                                                                                                                                                                                                                                                                                                                                                                                                                                                                                                                                                                                                                                                                                                                                                                                                                                                                                                                                                                                                                                                                                                                                                                                                                                                                                                                                                                                                                                                                                                                                                                                                                                                                                                                                                                                                                                                                                                                                                                                                                                                                                                                                                                                                                                                                                                                                                                                                                                                                                                                                                                                                                                                                                                                                                                                                                                                                                                                                                                                                                                                                                                                                                                                                                                                                                                                                                                                                                                                                                                                                                                                                                                                                                                                                                                                                                                                                                                                                                                                                                                                                                                                                                                                                                                                                                                                                                                                                                                                                                                                                                                                                                                                                                                                                                                                                                                                                                                                                                                                                                                                                                                                                                                                                                                                                                                                                                                                                                                                                                                                                                                                                                                                                                                                                                                                                                                                             | c.3581 C > G  | Heterozygous | Benign / Likely Benign         | Congenital Fibrosis of the Extraocular Muscles (FEOM)                    | Autosomal Dominant / Recessive            | No                 | RNA-seq                           |
| <p><b>Negative results from gene panel and RNA-seq analysis:</b> AARS2; ACADS; ACADVL; ACTA1; ADCK3; AFG3L2; AGK; AGL; AGRN; AIFM1; ALDOA; ANO5; ATP2A1; B3GALNT2; B3GNT1; BAG3; BIN1; C10ORF2; C12ORF65; CACNA1S; CAPN3; CAV3; CCDC78; CFL2; CHAT; CHCHD10; CHKB; CHRNA1; CHRN1; CHRNB1; CHRND; CHRNE; CLCN1; CNBP; CNTN1; COA5; COL4A1; COL6A1; COL6A2; COL6A3; COLQ; COQ2; COQ6; COQ9; COX10; COX14; COX6B1; CPT2; CRYAB; DES; DMD; DMPK; DNA2; DNAJB6; DNMT2; DOK7; DUX4; DYSL; EARS2; EMD; ENO3; FARS2; FASTKD2; FHL1; FKBP; FKTN; FLNC; FOXRED1; GAA; GBE1; GFER; GFM1; GFPT1; GNE; GTDC2; GYG1; GYS1; HADHA; HADHB; HCCS; HINT1; HNRNPA1; HNRNPA2B1; HRAS; HSPG2; ISCU; ISPD; ITGA7; KAT5B; KAT5C; KAT5D; KAT5E; KAT5F; KAT5G; KAT5H; KAT5I; KAT5J; KAT5K; KAT5L; KAT5M; KAT5N; KAT5O; KAT5P; KAT5Q; KAT5R; KAT5S; KAT5T; KAT5U; KAT5V; KAT5W; KAT5X; KAT5Y; KAT5Z; KAT5AA; KAT5AB; KAT5AC; KAT5AD; KAT5AE; KAT5AF; KAT5AG; KAT5AH; KAT5AI; KAT5AJ; KAT5AK; KAT5AL; KAT5AM; KAT5AN; KAT5AO; KAT5AP; KAT5AQ; KAT5AR; KAT5AS; KAT5AT; KAT5AU; KAT5AV; KAT5AW; KAT5AX; KAT5AY; KAT5AZ; KAT5BA; KAT5BB; KAT5BC; KAT5BD; KAT5BE; KAT5BF; KAT5BG; KAT5BH; KAT5BI; KAT5BJ; KAT5BK; KAT5BL; KAT5BM; KAT5BN; KAT5BO; KAT5BP; KAT5BQ; KAT5BR; KAT5BS; KAT5BT; KAT5BU; KAT5BV; KAT5BW; KAT5BX; KAT5BY; KAT5BZ; KAT5CA; KAT5CB; KAT5CC; KAT5CD; KAT5CE; KAT5CF; KAT5CG; KAT5CH; KAT5CI; KAT5CJ; KAT5CK; KAT5CL; KAT5CM; KAT5CN; KAT5CO; KAT5CP; KAT5CQ; KAT5CR; KAT5CS; KAT5CT; KAT5CU; KAT5CV; KAT5CW; KAT5CX; KAT5CY; KAT5CZ; KAT5DA; KAT5DB; KAT5DC; KAT5DD; KAT5DE; KAT5DF; KAT5DG; KAT5DH; KAT5DI; KAT5DJ; KAT5DK; KAT5DL; KAT5DM; KAT5DN; KAT5DO; KAT5DP; KAT5DQ; KAT5DR; KAT5DS; KAT5DT; KAT5DU; KAT5DV; KAT5DW; KAT5DX; KAT5DY; KAT5DZ; KAT5EA; KAT5EB; KAT5EC; KAT5ED; KAT5EE; KAT5EF; KAT5EG; KAT5EH; KAT5EI; KAT5EJ; KAT5EK; KAT5EL; KAT5EM; KAT5EN; KAT5EO; KAT5EP; KAT5EQ; KAT5ER; KAT5ES; KAT5ET; KAT5EU; KAT5EV; KAT5EW; KAT5EX; KAT5EY; KAT5EZ; KAT5FA; KAT5FB; KAT5FC; KAT5FD; KAT5FE; KAT5FF; KAT5FG; KAT5FH; KAT5FI; KAT5FJ; KAT5FK; KAT5FL; KAT5FM; KAT5FN; KAT5FO; KAT5FP; KAT5FQ; KAT5FR; KAT5FS; KAT5FT; KAT5FU; KAT5FV; KAT5FW; KAT5FX; KAT5FY; KAT5FZ; KAT5GA; KAT5GB; KAT5GC; KAT5GD; KAT5GE; KAT5GF; KAT5GG; KAT5GH; KAT5GI; KAT5GJ; KAT5GK; KAT5GL; KAT5GM; KAT5GN; KAT5GO; KAT5GP; KAT5GQ; KAT5GR; KAT5GS; KAT5GT; KAT5GU; KAT5GV; KAT5GW; KAT5GX; KAT5GY; KAT5GZ; KAT5HA; KAT5HB; KAT5HC; KAT5HD; KAT5HE; KAT5HF; KAT5HG; KAT5HH; KAT5HI; KAT5HJ; KAT5HK; KAT5HL; KAT5HM; KAT5HN; KAT5HO; KAT5HP; KAT5HQ; KAT5HR; KAT5HS; KAT5HT; KAT5HU; KAT5HV; KAT5HW; KAT5HX; KAT5HY; KAT5HZ; KAT5IA; KAT5IB; KAT5IC; KAT5ID; KAT5IE; KAT5IF; KAT5IG; KAT5IH; KAT5II; KAT5IJ; KAT5IK; KAT5IL; KAT5IM; KAT5IN; KAT5IO; KAT5IP; KAT5IQ; KAT5IR; KAT5IS; KAT5IT; KAT5IU; KAT5IV; KAT5IW; KAT5IX; KAT5IY; KAT5IZ; KAT5JA; KAT5JB; KAT5JC; KAT5JD; KAT5JE; KAT5JF; KAT5JG; KAT5JH; KAT5JI; KAT5JJ; KAT5JK; KAT5JL; KAT5JM; KAT5JN; KAT5JO; KAT5JP; KAT5JQ; KAT5JR; KAT5JS; KAT5JT; KAT5JU; KAT5JV; KAT5JW; KAT5JX; KAT5JY; KAT5JZ; KAT5KA; KAT5KB; KAT5KC; KAT5KD; KAT5KE; KAT5KF; KAT5KG; KAT5KH; KAT5KI; KAT5KJ; KAT5KK; KAT5KL; KAT5KM; KAT5KN; KAT5KO; KAT5KP; KAT5KQ; KAT5KR; KAT5KS; KAT5KT; KAT5KU; KAT5KV; KAT5KW; KAT5KX; KAT5KY; KAT5KZ; KAT5LA; KAT5LB; KAT5LC; KAT5LD; KAT5LE; KAT5LF; KAT5LG; KAT5LH; KAT5LI; KAT5LJ; KAT5LK; KAT5LM; KAT5LN; KAT5LO; KAT5LP; KAT5LQ; KAT5LR; KAT5LS; KAT5LT; KAT5LU; KAT5LV; KAT5LW; KAT5LX; KAT5LY; KAT5LZ; KAT5MA; KAT5MB; KAT5MC; KAT5MD; KAT5ME; KAT5MF; KAT5MG; KAT5MH; KAT5MI; KAT5MJ; KAT5MK; KAT5ML; KAT5MN; KAT5MO; KAT5MP; KAT5MQ; KAT5MR; KAT5MS; KAT5MT; KAT5MU; KAT5MV; KAT5MW; KAT5MX; KAT5MY; KAT5MZ; KAT5NA; KAT5NB; KAT5NC; KAT5ND; KAT5NE; KAT5NF; KAT5NG; KAT5NH; KAT5NI; KAT5NJ; KAT5NK; KAT5NL; KAT5NM; KAT5NO; KAT5NP; KAT5NQ; KAT5NR; KAT5NS; KAT5NT; KAT5NU; KAT5NV; KAT5NW; KAT5NX; KAT5NY; KAT5NZ; KAT5OA; KAT5OB; KAT5OC; KAT5OD; KAT5OE; KAT5OF; KAT5OG; KAT5OH; KAT5OI; KAT5OJ; KAT5OK; KAT5OL; KAT5OM; KAT5ON; KAT5OO; KAT5OP; KAT5OQ; KAT5OR; KAT5OS; KAT5OT; KAT5OU; KAT5OV; KAT5OW; KAT5OX; KAT5OY; KAT5OZ; KAT5PA; KAT5PB; KAT5PC; KAT5PD; KAT5PE; KAT5PF; KAT5PG; KAT5PH; KAT5PI; KAT5PJ; KAT5PK; KAT5PL; KAT5PM; KAT5PN; KAT5PO; KAT5PP; KAT5PQ; KAT5PR; KAT5PS; KAT5PT; KAT5PU; KAT5PV; KAT5PW; KAT5PX; KAT5PY; KAT5PZ; KAT5QA; KAT5QB; KAT5QC; KAT5QD; KAT5QE; KAT5QF; KAT5QG; KAT5QH; KAT5QI; KAT5QJ; KAT5QK; KAT5QL; KAT5QM; KAT5QN; KAT5QO; KAT5QP; KAT5QQ; KAT5QR; KAT5QS; KAT5QT; KAT5QU; KAT5QV; KAT5QW; KAT5QX; KAT5QY; KAT5QZ; KAT5RA; KAT5RB; KAT5RC; KAT5RD; KAT5RE; KAT5RF; KAT5RG; KAT5RH; KAT5RI; KAT5RJ; KAT5RK; KAT5RL; KAT5RM; KAT5RN; KAT5RO; KAT5RP; KAT5RQ; KAT5RR; KAT5RS; KAT5RT; KAT5RU; KAT5RV; KAT5RW; KAT5RX; KAT5RY; KAT5RZ; KAT5SA; KAT5SB; KAT5SC; KAT5SD; KAT5SE; KAT5SF; KAT5SG; KAT5SH; KAT5SI; KAT5SJ; KAT5SK; KAT5SL; KAT5SM; KAT5SN; KAT5SO; KAT5SP; KAT5SQ; KAT5SR; KAT5SS; KAT5ST; KAT5SU; KAT5SV; KAT5SW; KAT5SX; KAT5SY; KAT5SZ; KAT5TA; KAT5TB; KAT5TC; KAT5TD; KAT5TE; KAT5TF; KAT5TG; KAT5TH; KAT5TI; KAT5TJ; KAT5TK; KAT5TL; KAT5TM; KAT5TN; KAT5TO; KAT5TP; KAT5TQ; KAT5TR; KAT5TS; KAT5TT; KAT5TU; KAT5TV; KAT5TW; KAT5TX; KAT5TY; KAT5TZ; KAT5UA; KAT5UB; KAT5UC; KAT5UD; KAT5UE; KAT5UF; KAT5UG; KAT5UH; KAT5UI; KAT5UJ; KAT5UK; KAT5UL; KAT5UM; KAT5UN; KAT5UO; KAT5UP; KAT5UQ; KAT5UR; KAT5US; KAT5UT; KAT5UU; KAT5UV; KAT5UW; KAT5UX; KAT5UY; KAT5UZ; KAT5VA; KAT5VB; KAT5VC; KAT5VD; KAT5VE; KAT5VF; KAT5VG; KAT5VH; KAT5VI; KAT5VJ; KAT5VK; KAT5VL; KAT5VM; KAT5VN; KAT5VO; KAT5VP; KAT5VQ; KAT5VR; KAT5VS; KAT5VT; KAT5VU; KAT5VV; KAT5VW; KAT5VX; KAT5VY; KAT5VZ; KAT5WA; KAT5WB; KAT5WC; KAT5WD; KAT5WE; KAT5WF; KAT5WG; KAT5WH; KAT5WI; KAT5WJ; KAT5WK; KAT5WL; KAT5WM; KAT5WN; KAT5WO; KAT5WP; KAT5WQ; KAT5WR; KAT5WS; KAT5WT; KAT5WU; KAT5WV; KAT5WW; KAT5WX; KAT5WY; KAT5WZ; KAT5XA; KAT5XB; KAT5XC; KAT5XD; KAT5XE; KAT5XF; KAT5XG; KAT5XH; KAT5XI; KAT5XJ; KAT5XK; KAT5XL; KAT5XM; KAT5XN; KAT5XO; KAT5XP; KAT5XQ; KAT5XR; KAT5XS; KAT5XT; KAT5XU; KAT5XV; KAT5XW; KAT5XX; KAT5XY; KAT5XZ; KAT5YA; KAT5YB; KAT5YC; KAT5YD; KAT5YE; KAT5YF; KAT5YG; KAT5YH; KAT5YI; KAT5YJ; KAT5YK; KAT5YL; KAT5YM; KAT5YN; KAT5YO; KAT5YP; KAT5YQ; KAT5YR; KAT5YS; KAT5YT; KAT5YU; KAT5YV; KAT5YW; KAT5YX; KAT5YY; KAT5YZ; KAT5ZA; KAT5ZB; KAT5ZC; KAT5ZD; KAT5ZE; KAT5ZF; KAT5ZG; KAT5ZH; KAT5ZI; KAT5ZJ; KAT5ZK; KAT5ZL; KAT5ZM; KAT5ZN; KAT5ZO; KAT5ZP; KAT5ZQ; KAT5ZR; KAT5ZS; KAT5ZT; KAT5ZU; KAT5ZV; KAT5ZW; KAT5ZX; KAT5ZY; KAT5ZZ</p> <p><b>Additional negative results (RNA-seq analysis only):</b> BYN1, CLC1, COQ10, CYBA, CYBB, DAG1, DMM2, DNPB, ETF, ETFH, HNRPDL, KBTBD13, KLHL4, KLHL40, KLHL41, LBD3, LIMS2, MYPN, OCTN2, POGUT1, POPDC1, SPEC, TIA1, TOMP1, TOR1AIP1, TRAPPC11, ZNF9</p> |               |              |                                |                                                                          |                                           |                    |                                   |

<sup>1</sup> Panel from Medical Neurogenetics LLC. Intron/exon junction coverage  $\geq 99.0$

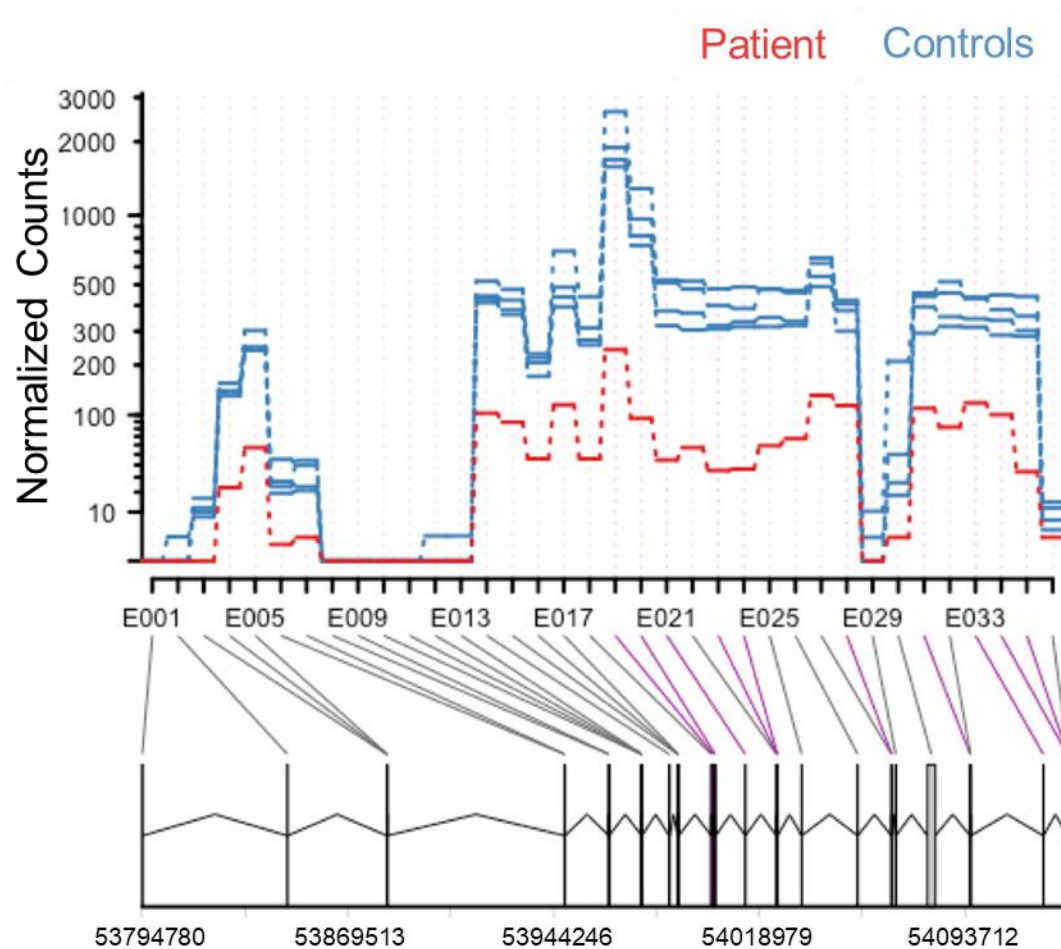

**Supplementary Figure 2. Exon usage of MLIP.** Exon usage analysis was conducted using DEXSeq, where Ensembl transcripts were collapsed. The flattening approach generates a singular transcript with 36 exons, where exon 5 of MLIP corresponds to either exon 18, 19 or 20 in the representation. When comparing the affected individuals with the healthy samples, a general downregulation of *MLIP* levels can be noted ( $\approx 3$ -5 fold), and is slightly emphasized around exon 5 ( $\approx 8$ -10 fold).

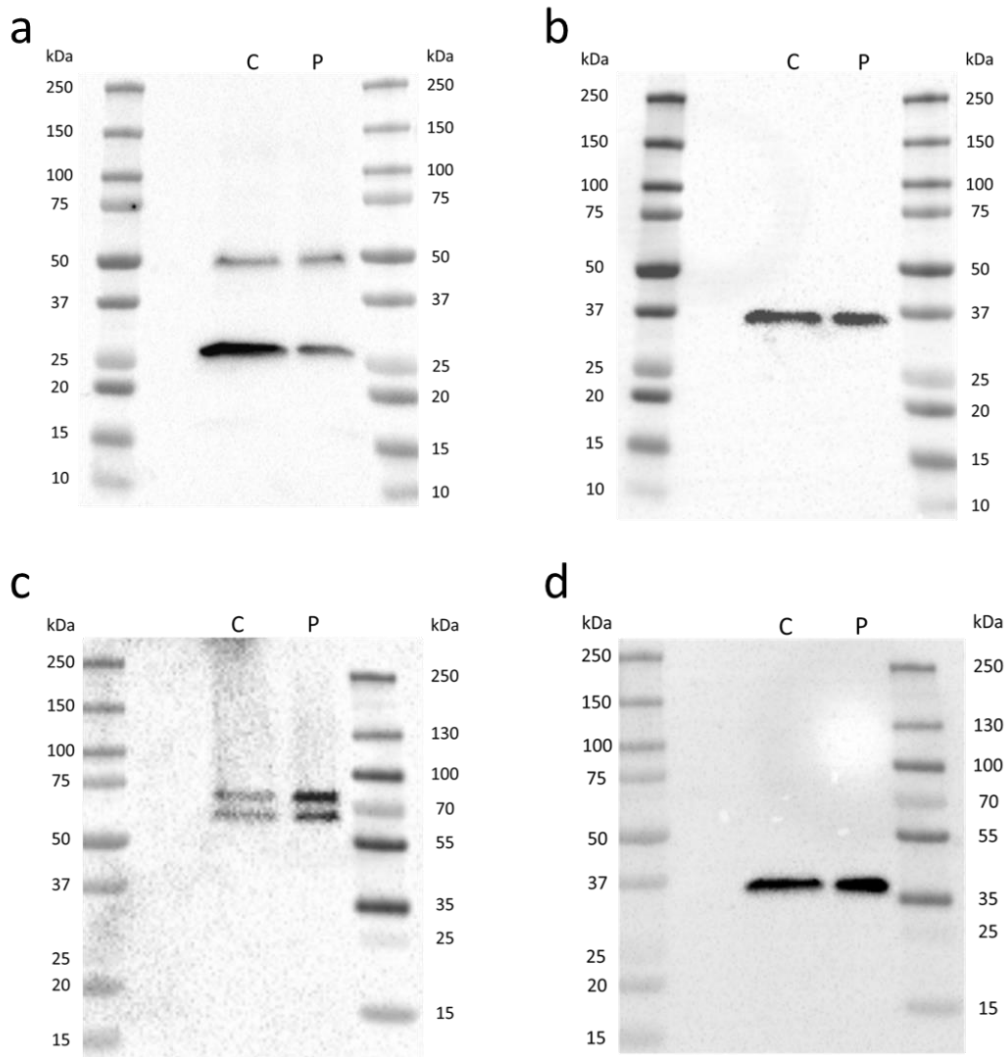

**Supplementary Figure 3. *MLIP* and *LMNA* respective expression in muscular tissue (A)** Western Blot analysis reveals the presence of four isoforms of *MLIP*, two of which can be quantified (27kDa and 50kDa). **(C)** Western Blot analysis reveals the presence of the two isoforms of *LMNA*, lamin A (75kDa) and lamin C (65kDa) were analyzed separately. **(B, D)** *GAPDH* is used as the reference gene for normalization. Full unaltered membranes are shown. Precision Plus Protein Dual Color Standards was used for all blots. PageRuler Plus Prestained Protein Ladder was added for the second blot (**C, D**: Right ladder).
